# Supplementary material for: Association Between Quality of Life and Procedural Outcome After Catheter Ablation for Atrial Fibrillation: A Secondary Analysis of a Randomized Clinical Trial
Source: PubMed Central journal article supplement — JAMA Netw Open. 2020 Dec 4;3(12):e2025473. doi: 10.1001/jamanetworkopen.2020.25473 (PMC7718606; doi:10.1001/jamanetworkopen.2020.25473), 2020-12-04
Supplement: jamanetwopen-e2025473-s002.pdf [file jamanetwopen-e2025473-s002.pdf]

## Supplementary Online Content

Terricabras M, Mantovan R, Jiang CY, et al; Substrate and Trigger Ablation for Reduction of Atrial Fibrillation Trial—Part II (STAR AF II) Investigators. Association between quality of life and procedural outcome after catheter ablation for atrial fibrillation: a secondary analysis of a randomized clinical trial. *JAMA Netw Open*. 2020;3(12):e2025473. doi:10.1001/jamanetworkopen.2020.25473

**eAppendix.** Supplement to methods section

**eTable 1.** Short Form 36 survey results from baseline to 18 months postablation by randomization

**eTable 2.** Short Form 36 survey results from baseline to 18 months postablation by recurrence >30 s

**eTable 3.** EQ-5D-3L and VAS scores from baseline to 18 months postablation

**eTable 4.** EQ-5D-3L and VAS scores from baseline to 18 months postablation by randomization arm

**eTable 5.** EQ-5D-3L and VAS scores from baseline to 18 months postablation by recurrence >30 s

This supplementary material has been provided by the authors to give readers additional information about their work.

## **eAppendix. Supplement to Methods Section**

### **36 item Short-Form Health Survey (SF-36)**

The SF-36 is a widely validated QOL questionnaire that assesses eight different health subscales: physical functioning (PF); bodily pain (BP); role limitations due to physical health problems (RP); role limitations due to personal or emotional problems (RE); mental health (MH); social functioning (SF); vitality (VI); and general health (GH). For each of the SF-36 subscales, scores are transformed to a scale ranging from 0 to 100 where a higher score indicates a better QOL. The eight subscales can also be grouped into two summary measures: the physical (PCS) and mental (MCS) component summary scores. According to the SF-36 manual, a 5-point difference in score is defined as clinically and socially relevant<sup>10</sup>.

### **EQ-D5 questionnaire**

The EQ-D5-3L is another validated generic tool for the assessment of health-related QOL that comprises 5 dimensions and a visual analogue scale: mobility, self-care, activity, pain and anxiety. The visual analogue scale (EQ-VAS) assesses the self-rated overall health status graded 0-100, where 100 is the best health state and 0 the worst<sup>11,12</sup>.

### **AF burden calculation**

Pre-procedure, if patients indicated they were constantly in AF for the 6 months prior to ablation (78% of patients), their pre-ablation burden was set as 100%. For the rest of the patients, AF burden was calculated by the following equation based on information from the baseline clinical reporting form:

$$\frac{\text{frequency of AF episodes per month} \times \text{average AF episode duration (hours)}}{24 \text{ hours} \times 30.4 \text{ days}} \times 100\%$$

Post-ablation, AF burden was calculated from the totality of Holter recordings as follows:

$$\frac{\text{total duration of AF on all available Holters (hours)}}{\text{total duration of all available Holters (hours)}} \times 100\%$$

It was also calculated from the percentage of weekly TTMs showing AF as follows:

$$\frac{\text{Number of weeks with at least one TTM showing AF}}{\text{Number of weeks of transmission}} \times 100\%$$

The highest post-ablation burden calculated from these two equations was then used for analysis.

These formulae were pre-specified in the statistical analysis plan available as a Supplement with the original publication<sup>9</sup>.

**eTable 1. Short Form 36 survey results from baseline to 18 months postablation by randomization**

|    | Baseline (SD) |             |             | 18 months (SD)* |             |             | Change BL-18 mo (95% CI) |                      |                      |
|----|---------------|-------------|-------------|-----------------|-------------|-------------|--------------------------|----------------------|----------------------|
|    | PVI           | PVI+CFAE    | PVI+LL      | PVI             | PVI+CFAE    | PVI+LL      | PVI                      | PVI+CFAE             | PVI+LL               |
| PF | 69.2 (24.2)   | 69.5 (24.6) | 67.0 (25.1) | 83.4 (17.6)     | 83.4 (19.0) | 79.1 (21.8) | 13.8<br>(12.3, 15.2)     | 13.0<br>(11.1, 14.9) | 12.4<br>(10.4, 14.4) |
| RP | 60.8 (28.0)   | 56.8 (29.6) | 54.0 (30.7) | 81.0 (21.6)     | 79.2 (25.0) | 74.4 (25.0) | 18.6<br>(16.0, 21.2)     | 22.0<br>(19.2, 24.7) | 19.8<br>(16.8, 22.8) |
| BP | 72.5 (24.0)   | 71.2 (27.1) | 69.4 (27.4) | 76.7 (25.3)     | 80.3 (23.6) | 77.6 (24.0) | 3.8<br>(1.2, 6.4)        | 8.3<br>(5.6, 10.9)   | 7.4<br>(4.8, 10.0)   |
| GH | 61.9 (19.1)   | 57.8 (18.8) | 57.5 (20.0) | 69.1 (18.4)     | 69.5 (19.2) | 67.2 (21.4) | 4.7<br>(2.9, 6.5)        | 11.4<br>(9.5, 13.2)  | 9.6<br>(7.6, 11.6)   |
| VI | 50.3 (16.8)   | 48.6 (18.6) | 49.2 (19.2) | 59.0 (12.9)     | 63.1 (16.5) | 61.6 (16.7) | 8.7<br>(7.2, 10.1)       | 13.9<br>(12.2, 15.6) | 12.8<br>(11.1, 14.4) |
| SF | 74.1 (23.2)   | 70.2 (26.3) | 71.3 (26.3) | 88.4 (16.2)     | 84.9 (20.7) | 83.2 (20.7) | 13.4<br>(11.0, 15.8)     | 12.9<br>(10.6, 15.2) | 11.2<br>(8.7, 13.7)  |
| RE | 78.4 (22.8)   | 69.9 (27.9) | 71.3 (28.6) | 87.7 (17.9)     | 85.6 (20.1) | 81.0 (24.0) | 7.3<br>(4.9, 9.7)        | 14.5<br>(11.9, 17.0) | 9.5<br>(6.8, 12.2)   |
| MH | 61.9 (15.7)   | 61.3 (15.1) | 62.3 (15.2) | 70.9 (11.8)     | 70.8 (13.2) | 70.4 (13.7) | 8.5<br>(7.0, 10.0)       | 9.0<br>(7.7, 10.2)   | 6.9<br>(5.6, 8.2)    |

PVI = pulmonary vein isolation; CFAE = complex fractionated electrograms; LL = linear lesions; PF = physical functioning; RP = role limitation due to physical problems; BP = bodily pain; GH = general health; VI = vitality; SF = social functioning; RE = role limitation due to emotional problems; MH = mental health; SD = standard deviation; 95% CI = 95% confidence interval limits; BL-18 mo = baseline to 18 month comparison

\* p < 0.05 using paired t test analysis compared to baseline subscale

**eTable 2. Short Form 36 survey results from baseline to 18 months postablation by recurrence**

**>30 s**

|    | Baseline (SD) |             | 18 months (SD)* |             | Change BL-18 mo (95% CI) |                   |
|----|---------------|-------------|-----------------|-------------|--------------------------|-------------------|
|    | No Recurrence | Recurrence  | No Recurrence   | Recurrence  | No Recurrence            | Recurrence        |
| PF | 70.6 (23.1)   | 65.9 (26.2) | 85.0 (17.4)     | 78.4 (21.9) | 13.2 (11.4, 15.0)        | 12.4 (10.3, 14.4) |
| RP | 58.4 (29.8)   | 54.3 (29.7) | 82.5 (21.9)     | 72.8 (26.1) | 23.0 (20.3, 25.7)        | 18.4 (15.5, 21.2) |
| BP | 72.6 (25.9)   | 69.0 (27.9) | 80.6 (23.1)     | 77.1 (24.5) | 7.5 (5.1, 9.9)           | 7.3 (4.5, 10.0)   |
| GH | 59.6 (18.3)   | 56.9 (20.1) | 71.6 (18.5)     | 65.6 (21.1) | 11.9 (10.0, 13.8)        | 8.1 (6.1, 10.0)   |
| VI | 51.2 (18.4)   | 47.0 (18.8) | 64.0 (15.7)     | 60.2 (16.6) | 12.5 (10.9, 14.1)        | 13.2 (11.6, 14.8) |
| SF | 72.6 (25.3)   | 70.1 (26.9) | 86.3 (19.0)     | 83.0 (21.2) | 12.1 (9.7, 14.5)         | 12.3 (9.8, 14.8)  |
| RE | 72.6 (27.0)   | 70.5 (28.7) | 86.1 (19.8)     | 81.7 (23.3) | 12.4 (10.0, 14.7)        | 10.7 (7.9, 13.5)  |
| MH | 62.6 (14.9)   | 61.7 (15.8) | 71.4 (12.9)     | 70.1 (13.5) | 7.8 (6.6, 9.0)           | 8.3 (6.9, 9.7)    |

S = seconds; PF = physical functioning; RP = role limitation due to physical problems; BP = bodily pain; GH = general health; VI = vitality; SF = social functioning; RE = role limitation due to emotional problems; MH = mental health; SD = standard deviation; 95% CI = 95% confidence interval limits; BL-18 mo = baseline to 18 month comparison  
 \* p < 0.05 using paired t test analysis compared to baseline subscale

**eTable 3. EQ-5D-3L and VAS scores from baseline to 18 months postablation**

|           |                                 | <b>Baseline</b>                     | <b>18 Months</b>                    | <b>Change from Baseline to 18 Months [95% CI]</b> |
|-----------|---------------------------------|-------------------------------------|-------------------------------------|---------------------------------------------------|
| Activity  | No problems                     | 59.8%                               | 82.0%                               | 22.2%<br>[16.6%, 27.5%]                           |
|           | Some problems                   | 37.9%                               | 17.6%                               | -20.3%<br>[-25.6%, -14.7%]                        |
|           | Extreme problems                | 2.3%                                | 0.4%                                | -1.9%<br>[-3.6%, -0.2%]                           |
| Pain      | No problems                     | 52.0%                               | 68.0%                               | 16.0%<br>[9.9%, 21.9%]                            |
|           | Some problems                   | 45.8%                               | 31.1%                               | -14.7%<br>[-20.6%, -8.6%]                         |
|           | Extreme problems                | 2.1%                                | 0.9%                                | -1.3%<br>[-3.0%, 0.5%]                            |
| Anxiety   | No problems                     | 58.9%                               | 74.7%                               | 15.7%<br>[9.9%, 21.4%]                            |
|           | Some problems                   | 37.2%                               | 24.0%                               | -13.1%<br>[-18.7%, -7.4%]                         |
|           | Extreme problems                | 3.9%                                | 1.3%                                | -2.6%<br>[-4.8%, -0.5%]                           |
| Mobility  | No problems                     | 74.7%                               | 86.1%                               | 11.3%<br>[6.3%, 16.1%]                            |
|           | Some problems                   | 25.1%                               | 13.9%                               | -11.1%<br>[-16.0%, -6.2%]                         |
|           | Extreme problems                | 0.2%                                | 0.0%                                | -0.2%<br>[-1.1%, 0.9%]                            |
| Self-care | No problems                     | 95.8%                               | 97.6%                               | 1.9%<br>[-0.5%, 4.3%]                             |
|           | Some problems                   | 3.7%                                | 2.4%                                | -1.3%<br>[-3.6%, 1.0%]                            |
|           | Extreme problems                | 0.5%                                | 0.0%                                | -0.5%<br>[-1.7%, 0.6%]                            |
| EQ-VAS    | Mean ± SD<br>Median<br>(Q1, Q3) | 65.3 ± 17.9<br>70.0<br>(53.0, 80.0) | 77.6 ± 14.9<br>80.0<br>(70.0, 90.0) | 12.1 ± 19.1<br>10.0<br>(0.0, 20.0)                |

**eTable 4. EQ-5D-3L and VAS scores from baseline to 18 months postablation by randomization arm**

|           |                                 | Baseline                            |                                     |                                     | 18 Months                           |                                     |                                     | Change from Baseline to 18 Months [95% CI] |                                          |                                          |
|-----------|---------------------------------|-------------------------------------|-------------------------------------|-------------------------------------|-------------------------------------|-------------------------------------|-------------------------------------|--------------------------------------------|------------------------------------------|------------------------------------------|
|           |                                 | PVI                                 | PVI + Lines                         | PVI + CFAE                          | PVI                                 | PVI + Lines                         | PVI + CFAE                          | PVI                                        | PVI + Lines                              | PVI + CFAE                               |
| Activity  | No problems                     | 66.7%                               | 55.4%                               | 62.5%                               | 81.5%                               | 80.9%                               | 83.3%                               | 14.8%<br>[-2.5%, 30.6%]                    | 25.4%<br>[16.7%, 33.5%]                  | 20.8%<br>[12.4%, 28.7%]                  |
|           | Some problems                   | 31.7%                               | 41.8%                               | 35.6%                               | 18.5%                               | 18.7%                               | 16.3%                               | -13.2%<br>[-29.0%, 4.0%]                   | -23.1%<br>[-31.2%, -14.5%]               | -19.3%<br>[-27.1%, -11.0%]               |
|           | Extreme problems                | 1.6%                                | 2.8%                                | 2.0%                                | 0.0%                                | 0.5%                                | 0.5%                                | -1.6%<br>[-9.7%, 6.8%]                     | -2.3%<br>[-5.5%, 0.7%]                   | -1.5%<br>[-4.4%, 1.4%]                   |
| Pain      | No problems                     | 52.4%                               | 51.0%                               | 53.0%                               | 63.0%                               | 66.5%                               | 70.9%                               | 10.6%<br>[-8.4%, 28.5%]                    | 15.5%<br>[6.1%, 24.4%]                   | 18.0%<br>[8.7%, 26.7%]                   |
|           | Some problems                   | 47.6%                               | 46.6%                               | 44.7%                               | 35.2%                               | 32.5%                               | 28.6%                               | -12.4%<br>[-30.1%, 6.6%]                   | -14.1%<br>[-23.0%, -4.7%]                | -16.1%<br>[-24.8%, -6.9%]                |
|           | Extreme problems                | 0.0%                                | 2.4%                                | 2.4%                                | 1.9%                                | 1.0%                                | 0.5%                                | 1.9%<br>[-5.5%, 11.2%]                     | -1.5%<br>[-4.6%, 1.7%]                   | -1.9%<br>[-4.9%, 1.1%]                   |
| Anxiety   | No problems                     | 67.7%                               | 62.8%                               | 53.0%                               | 74.1%                               | 76.6%                               | 72.9%                               | 6.3%<br>[-11.5%, 23.2%]                    | 13.8%<br>[5.0%, 22.1%]                   | 19.9%<br>[10.7%, 28.6%]                  |
|           | Some problems                   | 29.0%                               | 33.6%                               | 42.7%                               | 25.9%                               | 20.6%                               | 27.1%                               | -3.1%<br>[-19.9%, 14.4%]                   | -13.0%<br>[-21.1%, -4.5%]                | -15.6%<br>[-24.2%, -6.5%]                |
|           | Extreme problems                | 3.2%                                | 3.6%                                | 4.3%                                | 0.0%                                | 2.9%                                | 0.0%                                | -3.2%<br>[-12.2%, 5.5%]                    | -0.7%<br>[-4.5%, 3.3%]                   | -4.3%<br>[-7.9%, -1.3%]                  |
| Mobility  | No problems                     | 79.4%                               | 72.4%                               | 75.9%                               | 88.9%                               | 84.2%                               | 87.2%                               | 9.5%<br>[-5.5%, 23.5%]                     | 11.8%<br>[3.9%, 19.4%]                   | 11.3%<br>[3.8%, 18.5%]                   |
|           | Some problems                   | 20.6%                               | 27.6%                               | 23.7%                               | 11.1%                               | 15.8%                               | 12.8%                               | -9.5%<br>[-23.5%, 5.5%]                    | -11.8%<br>[-19.4%, -3.9%]                | -10.9%<br>[-18.0%, -3.4%]                |
|           | Extreme problems                | 0.0%                                | 0.0%                                | 0.4%                                | 0.0%                                | 0.0%                                | 0.0%                                | 0.0%<br>[-2.5%, 1.9%]                      | 0.0%<br>[-2.5%, 1.9%]                    | -0.4%<br>[-2.5%, 1.9%]                   |
| Self-care | No problems                     | 98.4%                               | 93.6%                               | 97.2%                               | 100.0%                              | 95.7%                               | 99.0%                               | 1.6%<br>[-6.8%, 9.7%]                      | 2.1%<br>[-2.6%, 6.6%]                    | 1.8%<br>[-1.5%, 5.0%]                    |
|           | Some problems                   | 1.6%                                | 5.6%                                | 2.4%                                | 0.0%                                | 4.3%                                | 1.0%                                | -1.6%<br>[-9.7%, 6.8%]                     | -1.3%<br>[-5.7%, 3.3%]                   | -1.4%<br>[-4.5%, 1.8%]                   |
|           | Extreme problems                | 0.0%                                | 0.8%                                | 0.4%                                | 0.0%                                | 0.0%                                | 0.0%                                | 0.0%<br>[-3.2%, 1.5%]                      | -0.8%<br>[-3.2%, 1.5%]                   | -0.4%<br>[-2.5%, 1.9%]                   |
| EQ-VAS    | Mean ± SD<br>Median<br>(Q1, Q3) | 67.3 ± 16.8<br>70.0<br>(55.0, 80.0) | 64.3 ± 19.0<br>68.0<br>(50.0, 80.0) | 65.7 ± 17.0<br>70.0<br>(55.0, 80.0) | 76.1 ± 16.0<br>80.0<br>(70.0, 87.0) | 76.7 ± 15.1<br>80.0<br>(70.0, 90.0) | 78.9 ± 14.4<br>80.0<br>(70.0, 90.0) | 9.2 ± 20.7 (51)<br>10.0<br>(0.0, 20.0)     | 12.2 ± 19.4 (204)<br>10.0<br>(0.0, 23.0) | 12.7 ± 18.5 (200)<br>10.0<br>(0.0, 20.0) |

**eTable 5. EQ-5D-3L and VAS scores from baseline to 18 months postablation by recurrence**

>30 s

|           |                                 | Baseline                            |                                     | 18 Months                           |                                     | Change from Baseline to 18 Months [95% CI] |                                    |
|-----------|---------------------------------|-------------------------------------|-------------------------------------|-------------------------------------|-------------------------------------|--------------------------------------------|------------------------------------|
|           |                                 | No recurrence                       | Recurrence                          | No recurrence                       | Recurrence                          | No recurrence                              | Recurrence                         |
| Activity  | No problems                     | 62.2%                               | 57.1%                               | 86.3%                               | 78.1%                               | 24.1%<br>[16.1%, 31.5%]                    | 21.0%<br>[12.8%, 28.9%]            |
|           | Some problems                   | 36.3%                               | 39.6%                               | 13.7%                               | 21.1%                               | -22.6%<br>[-30.0%, -14.6%]                 | -18.6%<br>[-26.3%, -10.5%]         |
|           | Extreme problems                | 1.5%                                | 3.3%                                | 0.0%                                | 0.8%                                | -1.5%<br>[-4.1%, 0.9%]                     | -2.5%<br>[-5.6%, 0.5%]             |
| Pain      | No problems                     | 55.2%                               | 49.6%                               | 69.4%                               | 66.8%                               | 14.2%<br>[5.2%, 22.9%]                     | 17.2%<br>[8.4%, 25.5%]             |
|           | Some problems                   | 43.3%                               | 47.5%                               | 30.1%                               | 32.0%                               | -13.2%<br>[-21.8%, -4.2%]                  | -15.5%<br>[-23.8%, -6.8%]          |
|           | Extreme problems                | 1.5%                                | 2.9%                                | 0.5%                                | 1.2%                                | -1.1%<br>[-3.7%, 1.6%]                     | -1.7%<br>[-4.8%, 1.3%]             |
| Anxiety   | No problems                     | 60.7%                               | 58.2%                               | 76.7%                               | 72.9%                               | 16.0%<br>[7.4%, 24.2%]                     | 14.7%<br>[6.3%, 22.8%]             |
|           | Some problems                   | 35.9%                               | 37.5%                               | 21.9%                               | 25.9%                               | -14.0%<br>[-22.0%, -5.5%]                  | -11.5%<br>[-19.5%, -3.3%]          |
|           | Extreme problems                | 3.4%                                | 4.4%                                | 1.4%                                | 1.2%                                | -2.1%<br>[-5.4%, 1.3%]                     | -3.1%<br>[-6.6%, 0.1%]             |
| Mobility  | No problems                     | 78.2%                               | 71.7%                               | 88.6%                               | 83.8%                               | 10.3%<br>[3.3%, 17.1%]                     | 12.1%<br>[4.7%, 19.2%]             |
|           | Some problems                   | 21.8%                               | 27.9%                               | 11.4%                               | 16.2%                               | -10.3%<br>[-17.1%, -3.3%]                  | -11.7%<br>[-18.9%, -4.3%]          |
|           | Extreme problems                | 0.0%                                | 0.4%                                | 0.0%                                | 0.0%                                | 0.0%<br>[-2.5%, 1.9%]                      | -0.4%<br>[-2.3%, 1.6%]             |
| Self-care | No problems                     | 96.6%                               | 94.9%                               | 97.3%                               | 98.0%                               | 0.7%<br>[-3.1%, 4.3%]                      | 3.0%<br>[-0.6%, 6.8%]              |
|           | Some problems                   | 3.1%                                | 4.3%                                | 2.7%                                | 2.0%                                | -0.3%<br>[-3.8%, 3.5%]                     | -2.3%<br>[-5.9%, 1.2%]             |
|           | Extreme problems                | 0.4%                                | 0.7%                                | 0.0%                                | 0.0%                                | -0.4%<br>[-2.4%, 1.8%]                     | -0.7%<br>[-2.9%, 1.3%]             |
| EQ-VAS    | Mean ± SD<br>Median<br>(Q1, Q3) | 66.6 ± 17.9<br>70.0<br>(60.0, 80.0) | 64.6 ± 17.7<br>70.0<br>(50.0, 80.0) | 79.2 ± 14.2<br>80.0<br>(70.0, 90.0) | 76.2 ± 15.4<br>80.0<br>(70.0, 90.0) | 12.6 ± 18.5<br>10.0<br>(0.0, 20.0)         | 11.7 ± 19.7<br>10.0<br>(0.0, 20.0) |
