# Supplementary material for: Association Between Quality of Life and Procedural Outcome After Catheter Ablation for Atrial Fibrillation: A Secondary Analysis of a Randomized Clinical Trial
Source: PubMed Central journal article supplement — JAMA Netw Open. 2020 Dec 4;3(12):e2025473. doi: 10.1001/jamanetworkopen.2020.25473 (PMC7718606; doi:10.1001/jamanetworkopen.2020.25473), 2020-12-04
Supplement: jamanetwopen-e2025473-s003.pdf [file jamanetwopen-e2025473-s003.pdf]

## **Data Sharing Statement**

Verma. Association Between Quality of Life and Procedural Outcome After Catheter Ablation for Atrial Fibrillation: A Secondary Analysis of a Randomized Clinical Trial. *JAMA Netw Open*. 2020;3(12):e2025473.  
10.1001/jamanetworkopen.2020.25473

**Data available:** No

### **Additional Information**

**Explanation for why data not available:** N/A
